# Supplementary material for: Binder free construction of hollow hierarchical Mn–Co–P nanoarrays on nickel foam as an efficient bifunctional electrocatalyst for overall water splitting
Source: Royal Society of Chemistry journal article supplement (doi:10.1039/d1se01608c), 2021-12-17
Supplement: d1se01608c1.pdf [file d1se01608c1.pdf]

## Supporting Information

### **Binder free construction of hollow hierarchical Mn-Co-P nanoarrays on nickel foam as an efficient bifunctional electrocatalyst for overall water splitting**

*Fan Wang<sup>a</sup>, Xingzhong Guo<sup>\*a,c</sup>, Fan He<sup>b</sup>, Yang Hou<sup>b</sup>, Fu Liu<sup>a</sup>, Chang Zou<sup>a</sup>, Hui Yang<sup>a</sup>*

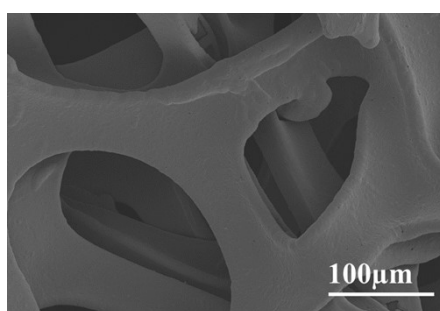

**Figure S1.** FESEM images of nickel foam.

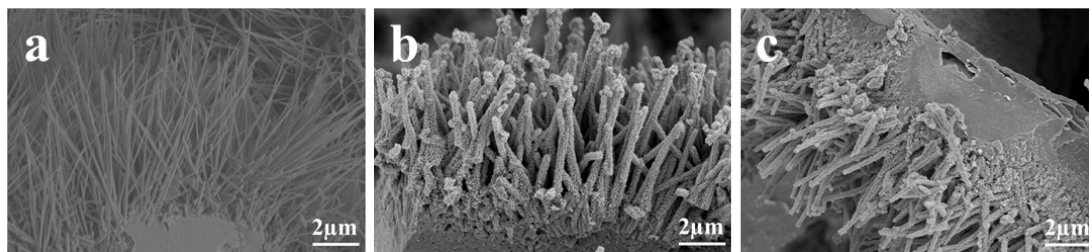

**Figure S2.** FESEM images of (a) Co precursor, (b) Mn-Co precursor and (c) Mn-Co-P nanoarrays.

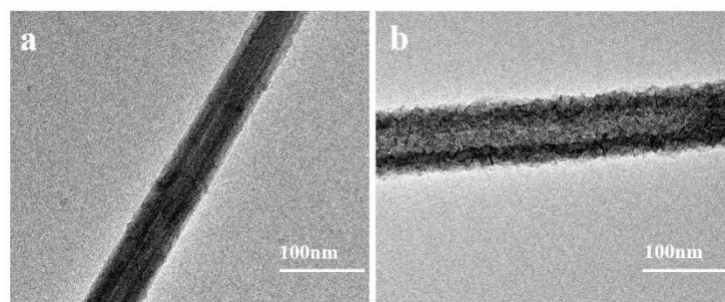

**Figure S3.** TEM images of (a) Co precursor and (b) Mn-Co precursor nanoarrays.

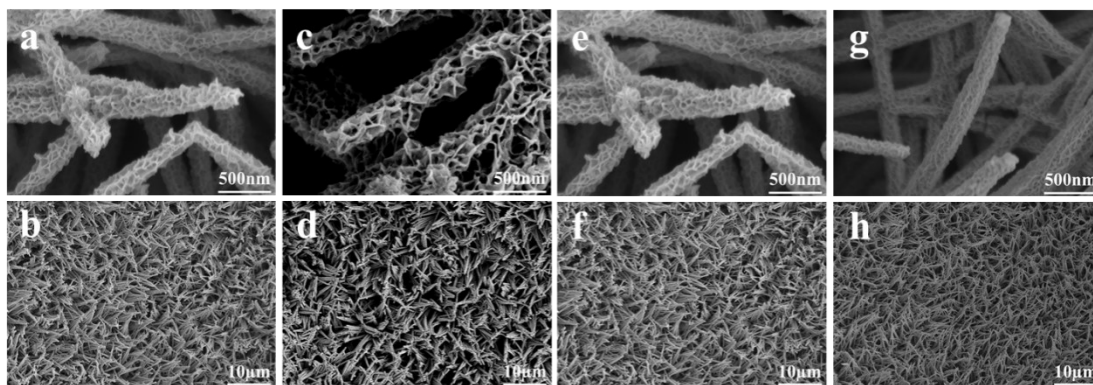

**Figure S4.** FESEM images of Mn-Co-P nanoarrays with different Mn contents: (a, b) 0.005 M, (c, d) 0.01 M, (e, f) 0.05 M and (g, h) 0.1 M.

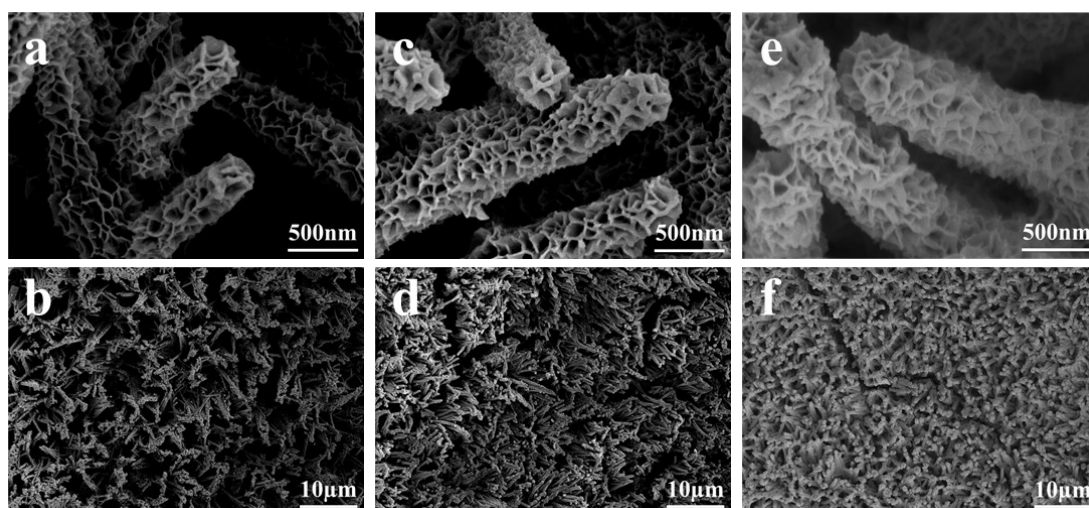

**Figure S5.** FESEM images of Mn-Co-P nanoarrays with different reaction time: (a, b) 3 h, (c, d) 5 h and (e, f) 10 h.

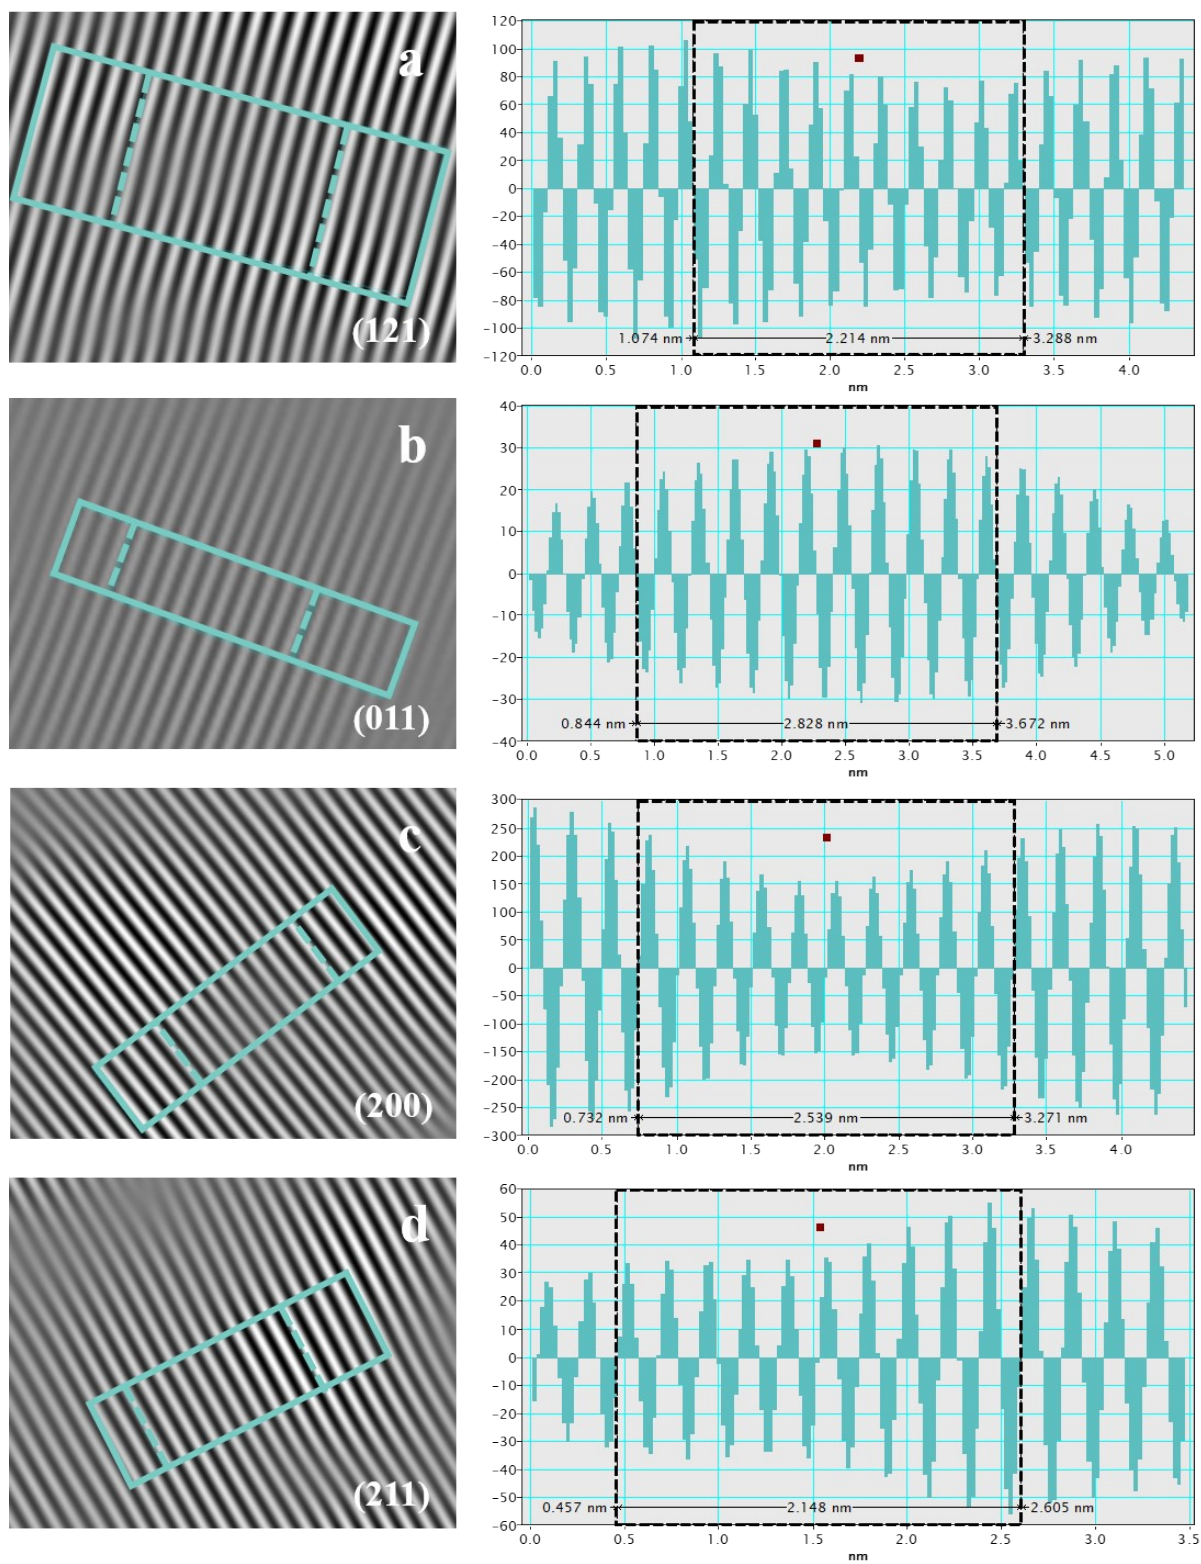

**Figure S6.** HRTEM images of Mn-Co-P nanoarrays.

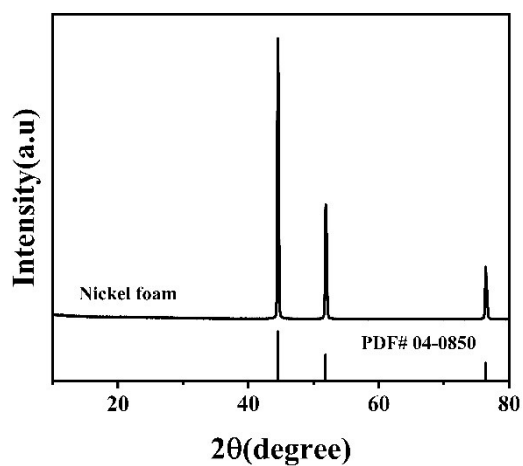

**Figure S7.** XRD pattern of nickel foam.

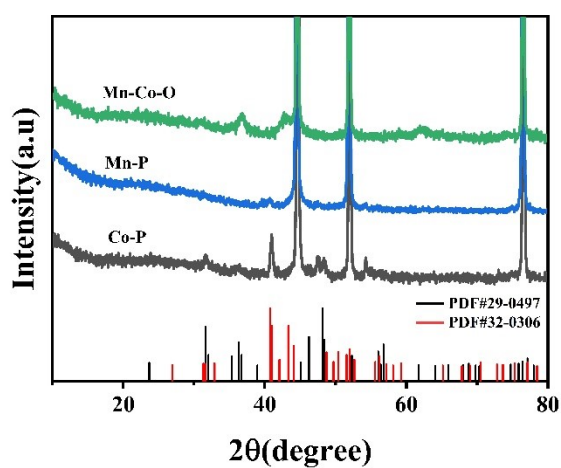

**Figure S8.** XRD patterns of Co-P, Mn-P and Mn-Co-O nanoarrays.

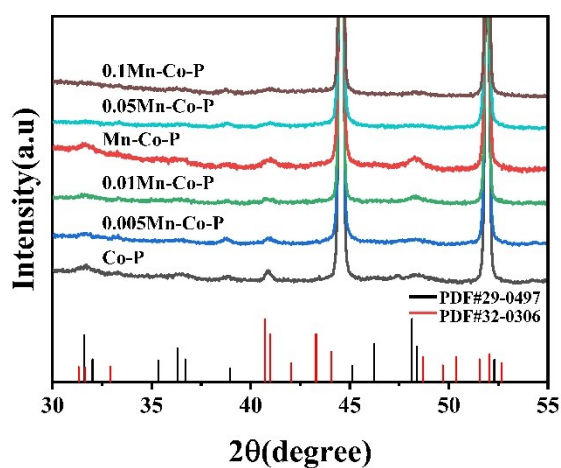

**Figure S9.** XRD patterns of Co-P and Mn-Co-P nanoarrays with different Mn contents.



**Table S1.** Metal-atomic content detected by ICP-MS analysis.

| Catalysts       | Mn (at. %) | Co (at. %) | P (at. %) |
|-----------------|------------|------------|-----------|
| Mn-Co precursor | 2.73       | 9.58       |           |
| Mn-Co-P         | 2.65       | 8.71       | 8.48      |

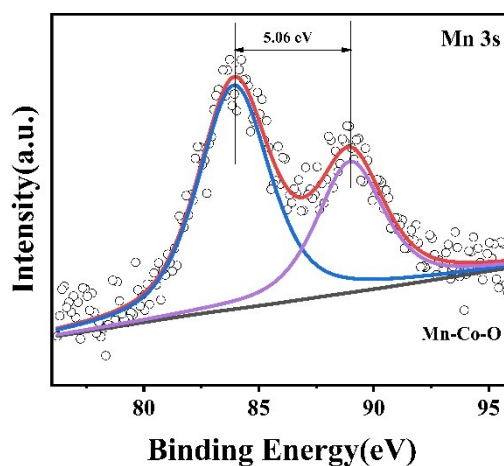

**Figure S10.** High-resolution XPS spectra of Mn-Co-O for Mn 3s.

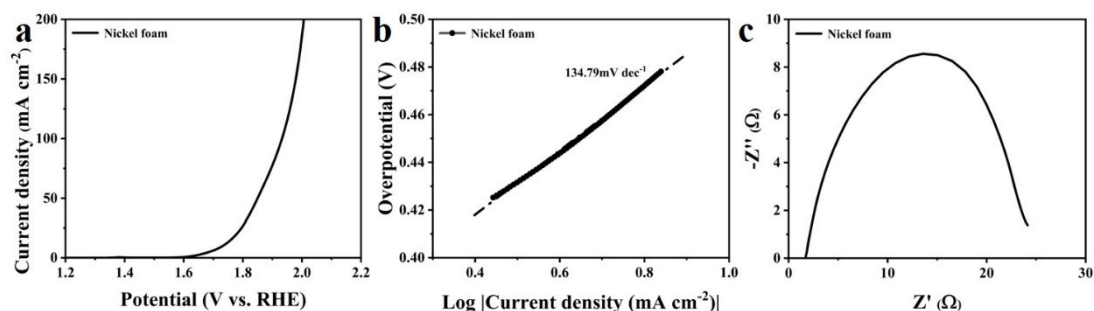

**Figure S11.** OER performance curves of nickel foam: (a) LSV, (b) the corresponding Tafel slope and (c) Nyquist plot.

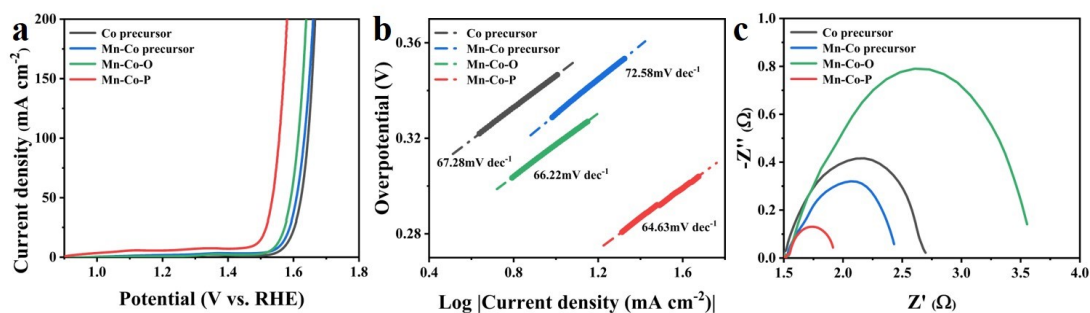

**Figure S12.** (a) LSV curves, (b) the corresponding Tafel plots and (c) Nyquist plots of Co precursor, Mn-Co precursor, Mn-Co-O and Mn-Co-P nanoarrays towards OER.

**Table S2.** Comparison of the OER performances of hollow hierarchical Mn-Co-P nanoarrays with the previously reported electrocatalysts at alkaline media.

| Electrocatalysts                          | Overpotential (mV)<br>at 10 mA cm <sup>-2</sup> | Overpotential (mV)<br>at 100 mA cm <sup>-2</sup> | Tafel slop<br>(mV dec <sup>-1</sup> ) | Reference |
|-------------------------------------------|-------------------------------------------------|--------------------------------------------------|---------------------------------------|-----------|
| Hollow hierarchical Mn-Co-P nanoarrays    | 250                                             | 326                                              | 64.63                                 | This work |
| CoMn-LDHs                                 | 395                                             |                                                  | 45                                    | 1         |
| MnO/Co/PGC                                | 301                                             |                                                  | 77                                    | 2         |
| CoMn-LDH@g-C <sub>3</sub> N <sub>4</sub>  | 303                                             |                                                  | 48                                    | 3         |
| N-CoO@CoP                                 |                                                 | 332                                              | 81.5                                  | 4         |
| Cu@CoP                                    | 270                                             |                                                  | 77.2                                  | 5         |
| CoFeBiP                                   | 273                                             |                                                  | 77.3                                  | 6         |
| Mn-Co-P/NF                                | 310                                             |                                                  | 194                                   | 7         |
| Ni-Fe-K <sub>0.23</sub> MnO <sub>2</sub>  |                                                 | 320                                              | 42.3                                  | 8         |
| CNFs-300                                  | 270                                             |                                                  |                                       |           |
| Mn <sub>3</sub> O <sub>4</sub> /CoP       | 306                                             |                                                  | 51.8                                  | 9         |
| MnCo@NiS                                  | 286                                             |                                                  | 31.5                                  | 10        |
| Mn-Co phosphide<br>yolk-shell spheres     | 330                                             |                                                  | 59                                    | 11        |
| MnCoP/CC                                  | 261                                             | 460                                              | 44.9                                  | 12        |
| Mn <sub>0.6</sub> Co <sub>0.4</sub> P-rGO | 250                                             |                                                  | 65                                    | 13        |
| Mn-CoP nanosheets                         | 290                                             |                                                  | 76                                    | 14        |
| Mn (5%)-CoP/CC                            | 317                                             |                                                  | 67.1                                  | 15        |
| CoMnP nanoparticles                       | 330                                             |                                                  | 61                                    | 16        |

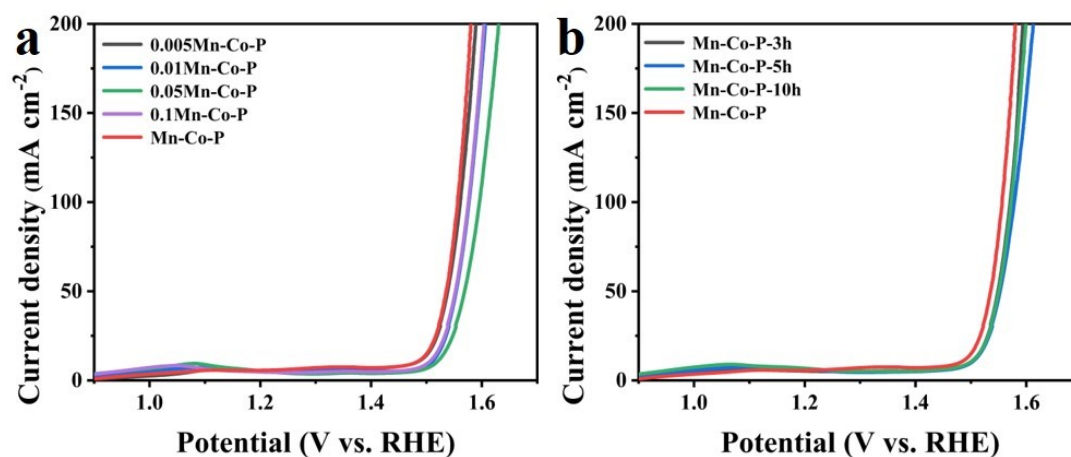

**Figure S13.** LSV curves of Mn-Co-P nanoarrays for (a) different Mn contents and (b) different reaction time towards OER.

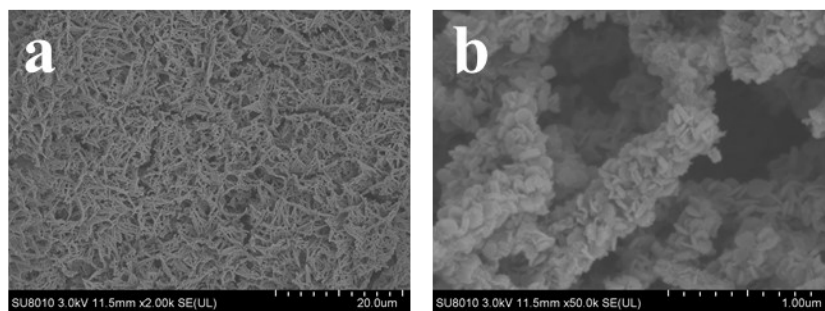

**Figure S14.** (a, b) FESEM images of hollow hierarchical Mn-Co-P nanoarrays after 72 h chronopotentiometry test towards OER.

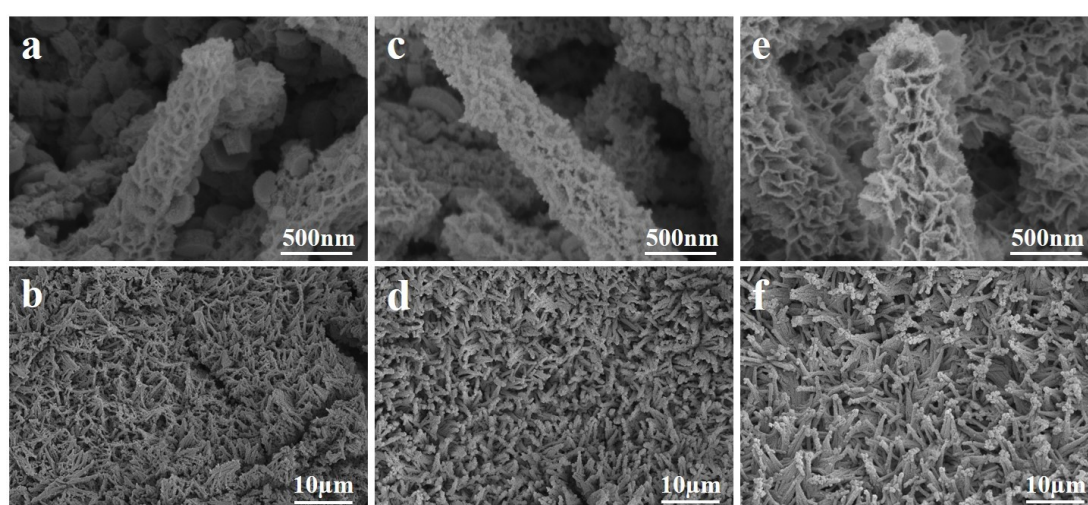

**Figure S15.** FESEM images of Mn-Co-P nanoarrays with different reaction time: (a, b) 3 h, (c, d) 5 h and (e, f) 10 h after LSV test towards OER.

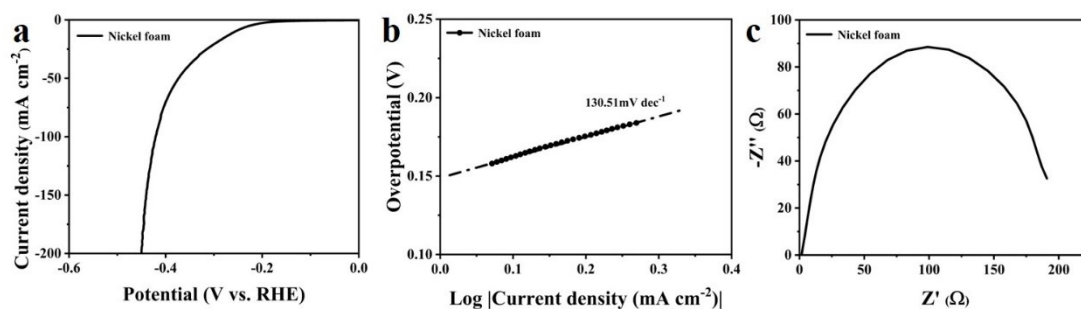

**Figure S16.** HER performance curves of nickel foam: (a) LSV, (b) the corresponding Tafel slope and (c) Nyquist plot.

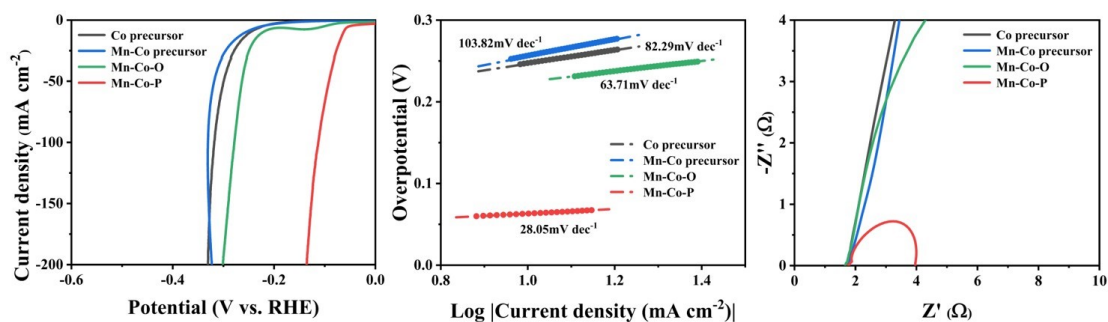

**Figure S17.** (a) LSV curves, (b) the corresponding Tafel plots and (c) Nyquist plots of Co precursor, Mn-Co precursor, Mn-Co-O and Mn-Co-P nanoarrays towards HER.

**Table S3.** Comparison of the HER performances of hollow hierarchical Mn-Co-P nanoarrays with the previously reported electrocatalysts at alkaline media.

| Electrocatalysts                                  | Overpotential (mV)<br>at 10 mA cm <sup>-2</sup> | Overpotential (mV)<br>at 100 mA cm <sup>-2</sup> | Tafel slop<br>(mV dec <sup>-1</sup> ) | Reference |
|---------------------------------------------------|-------------------------------------------------|--------------------------------------------------|---------------------------------------|-----------|
| Hollow hierarchical Mn-Co-P nanoarrays            | 63                                              | 112                                              | 28.05                                 | This work |
| Mn-Co-P/Ti                                        | 76                                              |                                                  | 52                                    | 17        |
| Co <sub>1</sub> Mn <sub>1</sub> Se NBs            | 87.3                                            |                                                  | 71.2                                  | 18        |
| CoMn-LDH@g-C <sub>3</sub> N <sub>4</sub>          | 406                                             |                                                  | 59                                    | 3         |
| N-CoO@CoP                                         |                                                 | 201                                              | 37                                    | 4         |
| Cu@CoP                                            | 88                                              |                                                  | 51.6                                  | 5         |
| Mn-Co-P/NF                                        | 63                                              |                                                  | 114                                   | 7         |
| Mn <sub>3</sub> O <sub>4</sub> /CoP               | 43                                              |                                                  | 28.9                                  | 9         |
| CoNiMn/NC                                         | 191                                             |                                                  | 64.38                                 | 19        |
| Mn-N-Co <sub>9</sub> S <sub>8</sub>               | 102                                             | 238                                              | 107.2                                 | 20        |
| Ni-Fe-K <sub>0.23</sub> MnO <sub>2</sub> CNFs-300 | 116                                             | 242                                              | 103.9                                 | 8         |
| CoMn-P@NG                                         | 164                                             |                                                  | 111                                   | 21        |
| MnCoP/CC                                          | 65                                              |                                                  | 46.16                                 | 12        |
| Mn-O@CoP                                          | 106                                             |                                                  | 56                                    | 22        |
| Mn <sub>0.6</sub> Co <sub>0.4</sub> P-rGO         | 54                                              |                                                  | 63                                    | 13        |
| Mn-Co-P                                           | 66                                              |                                                  | 82                                    | 23        |
| Mn-CoP nanosheets                                 | 195                                             |                                                  | 69                                    | 14        |
| Mn-CoP                                            | 95                                              |                                                  |                                       | 24        |
| Mn doped CoP                                      | 100                                             |                                                  | 53                                    | 25        |



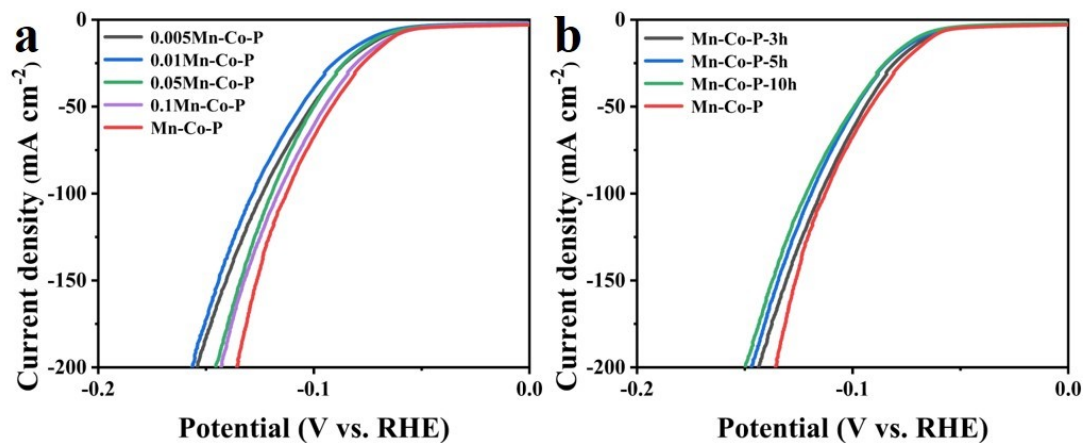

**Figure S18.** LSV curves of Mn-Co-P nanoarrays for (a) different content of Mn and (b) different reaction time of Mn towards HER.

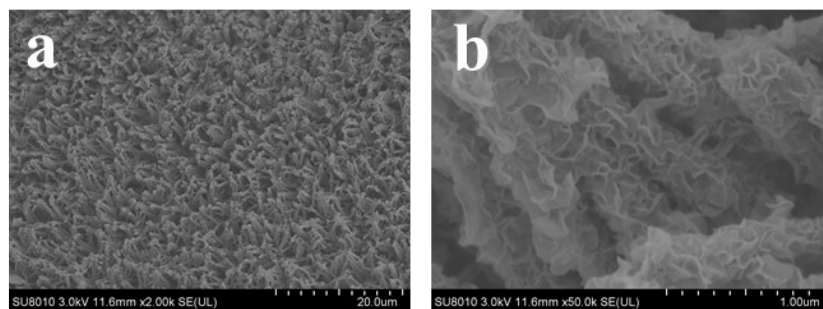

**Figure S19.** (a, b) FESEM images of hollow hierarchical Mn-Co-P nanoarrays after 72 h chronopotentiometry test towards HER.

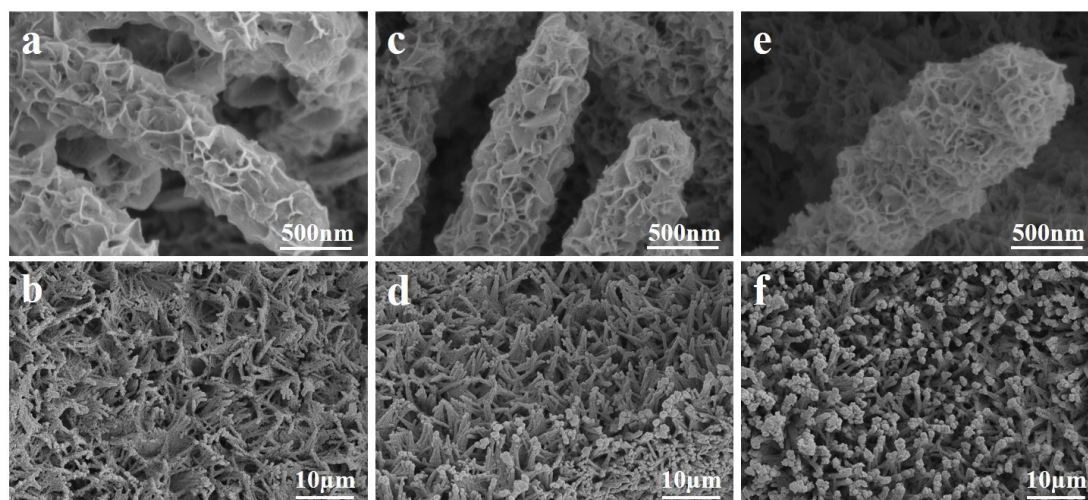

**Figure S20.** FESEM images of Mn-Co-P nanoarrays with different reaction time: (a, b) 3 h, (c, d) 5 h and (e, f) 10 h after LSV test towards HER.

**Table S4.** Comparison of overall water splitting performances of hollow hierarchical Mn-Co-P nanoarrays with previously reported electrocatalysts at alkaline media.

| Electrocatalysts                          | Voltage (V)<br>at 10 mA cm <sup>-2</sup> | Voltage (V)<br>at 100 mA cm <sup>-2</sup> | Reference |
|-------------------------------------------|------------------------------------------|-------------------------------------------|-----------|
| Hollow hierarchical Mn-Co-P nanoarrays    | 1.57                                     | 1.71                                      | This work |
| Co <sub>1</sub> Mn <sub>1</sub> Se NBs    | 1.60                                     |                                           | 18        |
| Co <sub>2</sub> Mn <sub>1</sub> DH        | 1.65                                     |                                           | 26        |
| CoMn-LDH@g-C <sub>3</sub> N <sub>4</sub>  | 1.62                                     |                                           | 3         |
| N-CoO@CoP                                 |                                          | 1.79                                      | 4         |
| Cu@CoP                                    | 1.65                                     |                                           | 5         |
| Mn <sub>3</sub> O <sub>4</sub> /CoP       | 1.599                                    |                                           | 9         |
| MnFeO-NF                                  | 1.59                                     |                                           | 27        |
| Ni-Fe-K <sub>0.23</sub> MnO <sub>2</sub>  |                                          | 1.81                                      | 8         |
| CNFs-300                                  | 1.62                                     |                                           |           |
| MnCoP/CC                                  | 1.68                                     |                                           | 12        |
| Mn <sub>0.6</sub> Co <sub>0.4</sub> P-rGO | 1.55                                     | 1.77                                      | 13        |
| Mn-Co-P                                   | 1.74                                     |                                           | 23        |

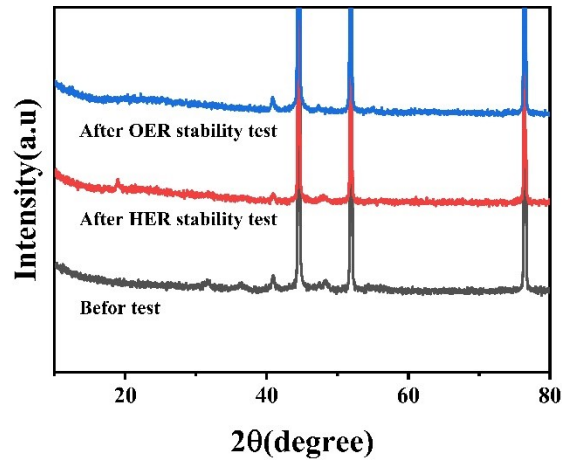

**Figure S21.** XRD patterns of hollow hierarchical Mn-Co-P nanoarrays before test, after HER stability test and after OER stability test.

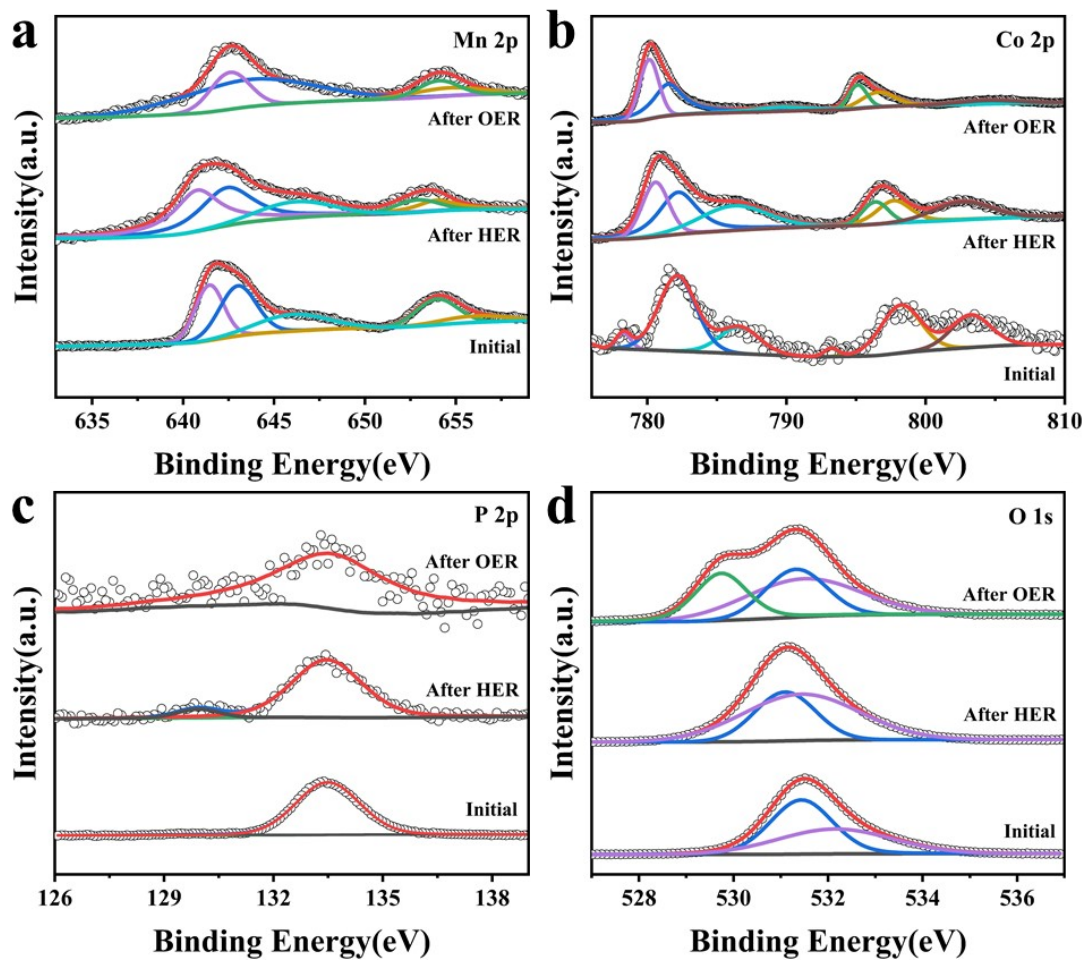

**Figure S22.** XPS spectra of (a) Mn 2p, (b) Co 2p, (c) P 2p and (d) O 1s of hollow hierarchical Mn-Co-P nanoarrays before test, after HER stability test and after OER stability test.

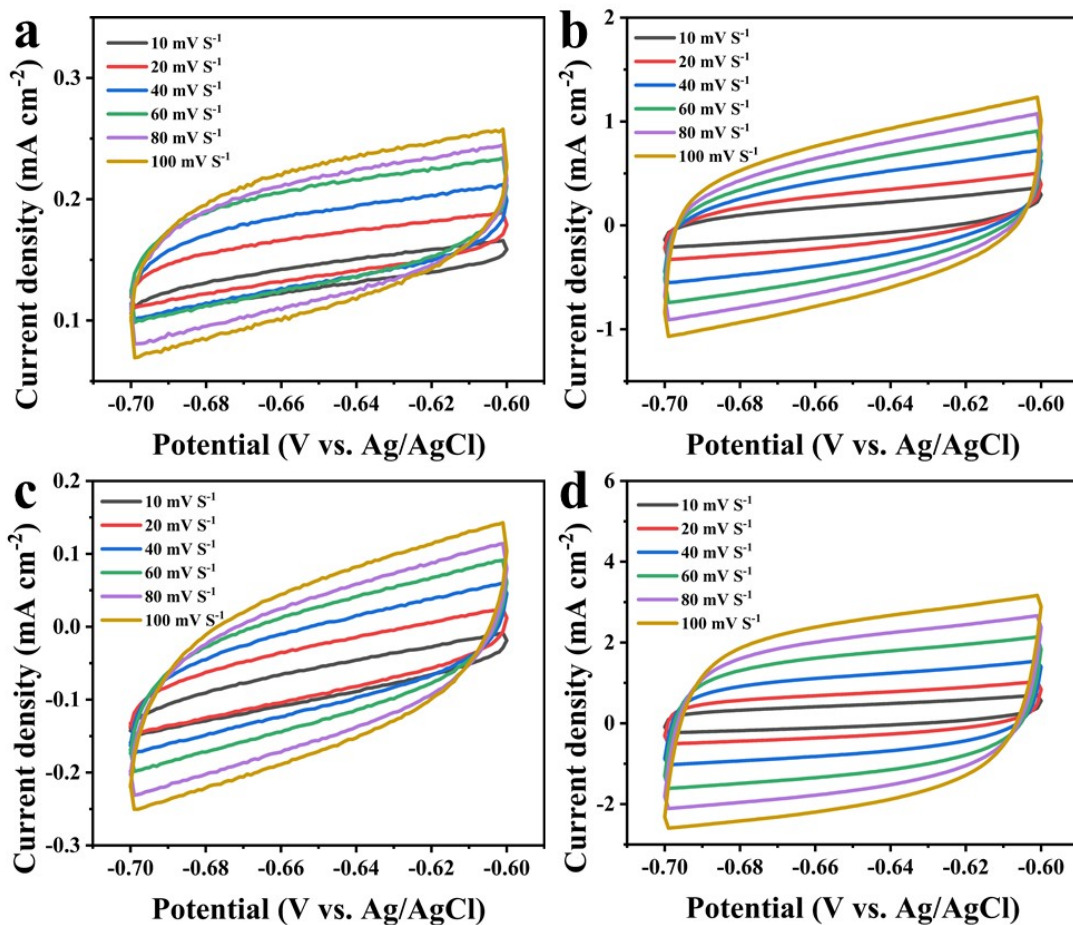

**Figure S23.** CV curves of (a) nickel foam, (b) Co-P, (c) Mn-P, and (d) Mn-Co-P nanoarrays at different scan rates (10, 20, 40, 60, 80 and 100 mV s<sup>-1</sup>) in the non-faradaic potential region of -0.7 to -0.6 V vs. Ag/AgCl.

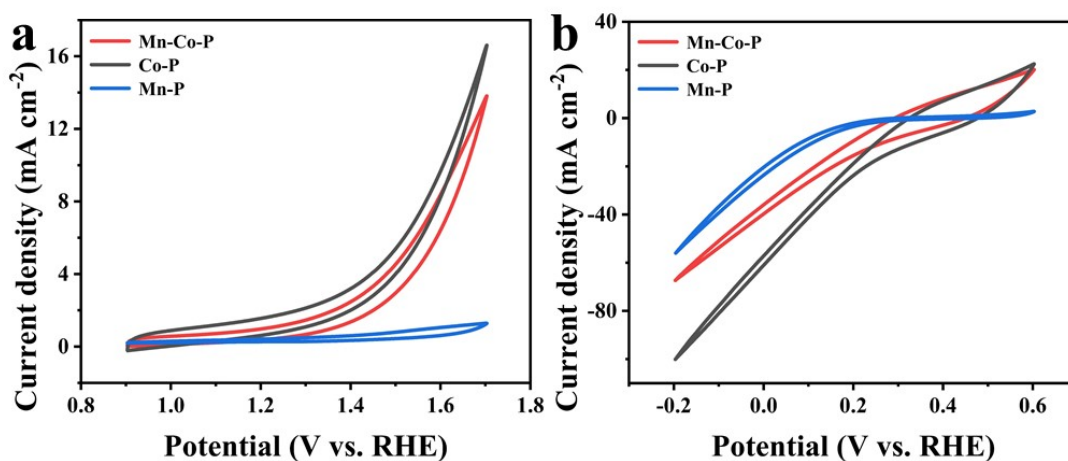

**Figure S24.** CV curves of Co-P, Mn-P and Mn-Co-P nanoarrays at a scan rate of 50 mV s<sup>-1</sup> in 1.0 M PBS (pH=7) for (a) OER and (b) HER.

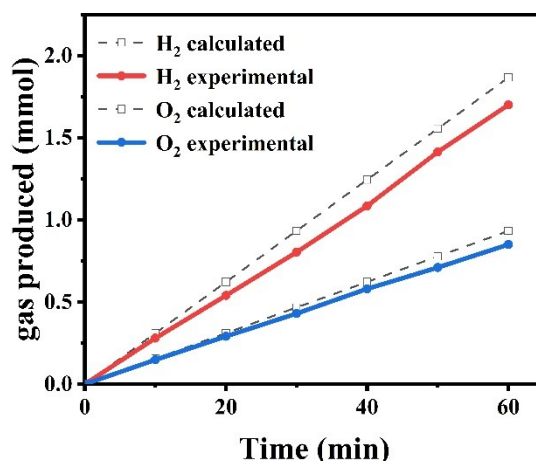

**Figure S25.** The quantity of gas theoretically calculated and experimentally measured versus time employing hollow hierarchical Mn-Co-P nanoarrays as both anode and cathode at current density of  $100 \text{ mA cm}^{-2}$ .

## References

1. Z. Yi, C. Ye, M. Zhang, Y. Lu, Y. Liu, L. Zhang and K. Yan, *Appl. Surf. Sci.*, 2019, **480**, 256-261.
2. X. F. Lu, Y. Chen, S. Wang, S. Gao and X. W. D. Lou, *Adv. Mater.*, 2019, **31**, e1902339.
3. M. Arif, G. Yasin, M. Shakeel, X. Fang, R. Gao, S. Ji and D. Yan, *Chem. Asian. J.*, 2018, **13**, 1045-1052.
4. M. Lu, L. Li, D. Chen, J. Li, N. I. Klyui and W. Han, *Electrochim. Acta*, 2020, **330**, 135210.
5. P. Wang, Y. Lin, L. Wan and B. Wang, *Energy & Fuels*, 2020, **34**, 10276-10281.
6. C. Wang, H. Shang, Y. Wang, J. Li, S. Guo, J. Guo and Y. Du, *Nanoscale*, 2021, **13**, 7279-7284.
7. Z. Feng, Y. Sui, Z. Sun, J. Qi, F. Wei, Y. Ren, Z. Zhan, M. Zhou, D. Meng, L. Zhang, L. Ma and Q. Wang, *Colloid Surface A*, 2021, **615**, 126265.
8. H. Liao, X. Guo, Y. Hou, H. Liang, Z. Zhou and H. Yang, *Small*, 2020, **16**, e1905223.
9. R. Dong, A. Zhu, W. Zeng, L. Qiao, L. Lu, Y. Liu, P. Tan and J. Pan, *Appl. Surf. Sci.*, 2021, **544**, 148860.
10. X. Wang, L. Li, L. Xu, Z. Wang, Z. Wu, Z. Liu and P. Yangs, *J. Power Sources*, 2021, **489**, 229525.
11. Y. V. Kaneti, Y. Guo, N. L. W. Septiani, M. Iqbal, X. Jiang, T. Takei, B. Yulianto, Z. A. Alothman, D. Golberg and Y. Yamauchi, *Chem. Eng. J.*, 2021, **405**, 126580.
12. M. Wang, W. Fu, L. Du, Y. Wei, P. Rao, L. Wei, X. Zhao, Y. Wang and S. Sun, *Appl. Surf. Sci.*, 2020, **515**, 146059.
13. X. Xu, H. Liang, G. Tang, Y. Hong, Y. Xie, Z. Qi, B. Xu and Z. Wang, *Nanoscale Adv.*, 2019, **1**, 177-183.
14. Y. Li, B. Jia, B. Chen, Q. Liu, M. Cai, Z. Xue, Y. Fan, H. P. Wang, C. Y. Su and G. Li, *Dalton Trans.*, 2018, **47**, 14679-14685.
15. J. Lin, S. Xie, P. Liu, M. Zhang, S. Wang, P. Zhang and F. Cheng, *J. Mater. Res.*, 2017, **33**, 1258-1267.
16. D. Li, H. Baydoun, C. N. Verani and S. L. Brock, *J. Am. Chem. Soc.*, 2016, **138**, 4006-4009.



17. T. Liu, X. Ma, D. Liu, S. Hao, G. Du, Y. Ma, A. M. Asiri, X. Sun and L. Chen, *ACS Catal.*, 2016, **7**, 98-102.
18. H. Xu, J. Wei, K. Zhang, M. Zhang, C. Liu, J. Guo and Y. Du, *J. Mater. Chem. A*, 2018, **6**, 22697-22704.
19. B. Jiang and Z. Li, *J. Solid State Chem.*, 2021, **295**, 121912.
20. Y. Xing, D. Li, L. Li, H. Tong, D. Jiang and W. Shi, *Int. J. Hydrog. Energy*, 2021, **46**, 7989-8001.
21. J. Liu, W. Li, Z. Cui, J. Li, F. Yang, L. Huang, C. Ma and M. Zeng, *Chem. Commun. (Camb)*, 2021, **57**, 7200-2403.
22. D. Zhou, Z. Wang, X. Long, Y. An, H. Lin, Z. Xing, M. Ma and S. Yang, *J. Mater. Chem. A*, 2019, **7**, 22530-22538.
23. G. Tang, Y. Zeng, B. Wei, H. Liang, J. Wu, P. Yao and Z. Wang, *Energy Technol.*, 2019, **7**, 1900066.
24. X. Li, S. Li, A. Yoshida, S. Sirisomboonchai, K. Tang, Z. Zuo, X. Hao, A. Abudula and G. Guan, *Catal. Sci. Technol.*, 2018, **8**, 4407-4412.
25. Y. Ge, J. Chen, H. Chu, P. Dong, S. R. Craig, P. M. Ajayan, M. Ye and J. Shen, *ACS Sustain. Chem. Eng.*, 2018, **6**, 15162-15169.
26. K. Li, D. Guo, J. Kang, B. Wei, X. Zhang and Y. Chen, *ACS Sustain. Chem. Eng.*, 2018, **6**, 14641-14651.
27. J. Luo, W. H. Guo, Q. Zhang, X. H. Wang, L. Shen, H. C. Fu, L. L. Wu, X. H. Chen, H. Q. Luo and N. B. Li, *Nanoscale*, 2020, **12**, 19992-20001.
